# Supplementary material for: Genomic assessment of quarantine measures to prevent SARS-CoV-2 importation and transmission
Source: PubMed Central journal article supplement (PMC8866425; doi:10.1038/s41467-022-28371-z), 2022-02-23
Supplement: 41467_2022_28371_MOESM3_ESM.pdf [file 41467_2022_28371_MOESM3_ESM.pdf]

## **Description of Additional Supplementary Files**

File Name: Supplementary Data 1

Description: ENA accession codes of imported sequences used in this study
